Development 138, 1015 (2011) doi:10.1242/dev.065151  
© 2011. Published by The Company of Biologists Ltd

## Laminins, via heparan sulfate proteoglycans, participate in zebrafish myotome morphogenesis by modulating the pattern of Bmp responsiveness

**Morgane Dolez, Jean-François Nicolas and Estelle Hirsinger**

There was an error published in *Development* **138**, 97-106.

The sequence of the *lamc1* morpholino was incorrect (a T was omitted). The corrected sentence appears below.

The MO (Gene Tools) used against *lamc1* was 5'-TGTGTCCTTTTGCTATTGCGACCTC-3' (Parsons et al., 2002).

The authors apologise to readers for this mistake.
